# Supplementary material for: Patulin Ameliorates Hypertrophied Lipid Accumulation and Lipopolysaccharide-Induced Inflammatory Response by Modulating Mitochondrial Respiration
Source: MDPI journal article supplement (doi:10.3390/antiox12091750), 2023-09-11
Supplement: s1 [file s1]

## Supplementary Materials For

# Patulin Ameliorates Hypertrophied Lipid Accumulation and Lipopolysaccharide-Induced Inflammatory Response by Modulating Mitochondrial Respiration

Sulmin Hong <sup>1,2</sup>, Seon Kyeong Park <sup>1</sup>, Jangho Lee <sup>1</sup>, Soo Hyun Park <sup>1</sup>, Young-Soo Kim <sup>2</sup>, Jae-Ho Park <sup>1</sup>, Seungmin Yu <sup>1,\*</sup> and Yu Geon Lee <sup>1,\*</sup>

<sup>1</sup> Personalized Diet Research Group, Korea Food Research Institute (KFRI), Wanju 55365, Republic of Korea

<sup>2</sup> Department of Food Science & Technology, Chonbuk National University, Jeonju 54896, Republic of Korea

\* Correspondence: y.seungmin@kfri.re.kr (S.Y.); ugun2@kfri.re.kr (Y.G.L.); Tel.: +82-63-219-9565 (S.Y); +82-63-219-9585 (Y.G.L.)

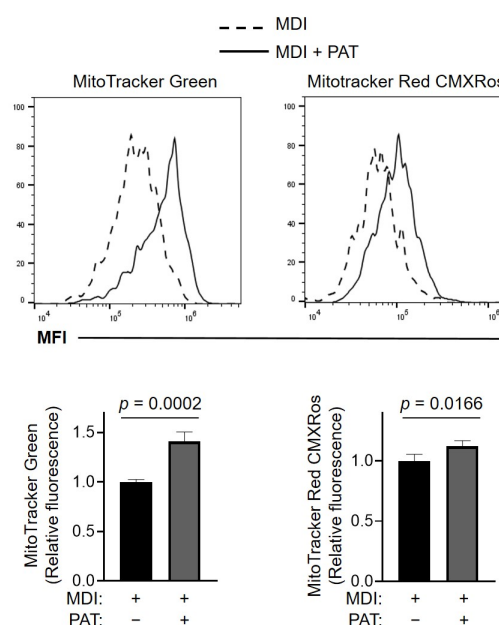

**Figure S1.** Analysis of mitochondrial function in 3T3-L1 adipocytes. 3T3-L1 cells were seeded and induced to differentiate in the presence of patulin (PAT, 1 or 5  $\mu$ M) for 8 days. Mitotracker Green and Mitotracker red-stained cells were detected using flow cytometer, and the relative fluorescence intensity was calculated by normalizing to the MFI values of the PAT-untreated control. Statistical significance ( $p$  value) was determined using unpaired two-tailed Student's  $t$ -test.

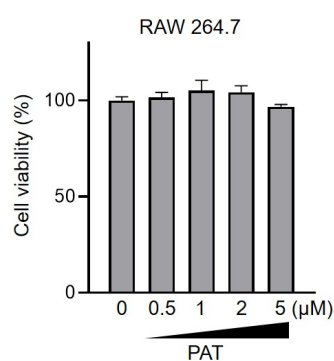

**Figure S2.** Effects of patulin (PAT) on RAW 264.7 cell viability. RAW 264.7 cells were incubated in a medium containing different concentrations of PAT for 6 h. Cell viability was measured using WST-1 kit.

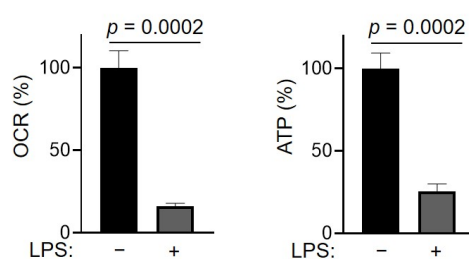

**Figure S3.** Effects of lipopolysaccharide (LPS) treatment on mitochondrial oxidative function in RAW 264.7 macrophages. Oxygen consumption rate (OCR) and ATP production levels were determined as described in the Materials and Methods. The data were normalized to the OCR values of the unstimulated control. Statistical significance ( $p$  value) was determined using unpaired two-tailed Student's  $t$ -test.

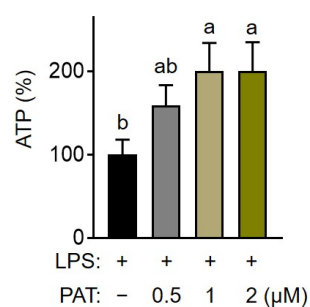

**Figure S4.** Effects of patulin (PAT) on the mitochondrial ATP production in lipopolysaccharide (LPS)-induced RAW 264.7 macrophages. ATP generation was calculated as described in the Materials and Methods. The data were normalized to calculated OCR values for the PAT-untreated control. Different letters indicate significantly different values at  $p < 0.05$ , as determined by one-way ANOVA followed by Tukey's post-hoc test.

**Table S1.** Primer sequences of mouse mRNA used in RT-PCR analysis

| Gene                            | Direction | Sequence (5'-3')         |
|---------------------------------|-----------|--------------------------|
| <i>Ppar<math>\gamma</math></i>  | forward   | GCGGGCTGAGAAGTCACGTT     |
|                                 | reverse   | CCATCACGGAGAGGTCCACA     |
| <i>C/ebpa</i>                   | forward   | TACCGAGTAGGGGGAGCA       |
|                                 | reverse   | TCATTTTTCTCACGGGGCC      |
| <i>Fasn</i>                     | forward   | AGAAGCCATGTGGGGAAGATT    |
|                                 | reverse   | AGCAGGGACAGGACAAGACAA    |
| <i>Acly</i>                     | forward   | CTTGGGCCGGAACAAAA        |
|                                 | reverse   | GCCGAGGTGGTGCAGAT        |
| <i>Fabp4</i>                    | forward   | GGGAACCTGGAAGCTTGTCT     |
|                                 | reverse   | ACTCTCTGACCGGATGGTGA     |
| <i>Cd36</i>                     | forward   | GTGCAAAACCCAGATGACGT     |
|                                 | reverse   | TCCAACAGACAGTGAAGGCT     |
| <i>Dgat1</i>                    | forward   | GGCCCAAGGTAGAAGAGGAC     |
|                                 | reverse   | GATCAGCATCACACACACC      |
| <i>Gpat</i>                     | forward   | GTAGTTGAACTCCTCCGACA     |
|                                 | reverse   | ATCCACTACCACTGAGAGGA     |
| <i>Pgc1<math>\alpha</math></i>  | forward   | AAGTGGTGTAGCGACCAATCG    |
|                                 | reverse   | AATGAGGGCAATCCGTCTTCA    |
| <i>Cpt1<math>\alpha</math></i>  | forward   | CTCCGCCTGAGCCATGAAG      |
|                                 | reverse   | CACCAGTGATGCCATTCT       |
| <i>Il-6</i>                     | forward   | CAAAGCCAGAGTCCTTCAGA     |
|                                 | reverse   | TTGGTCCTTAGCCACTCCTT     |
| <i>Tnf-<math>\alpha</math></i>  | forward   | AGCCACGTCGTAGCAAACCAC    |
|                                 | reverse   | AGGTACAACCCATCGGCTGGCA   |
| <i>inos</i>                     | forward   | CCTGTGTTCCACCAGGAGAT     |
|                                 | reverse   | CCCTGGCTAGTGCTTCAGAC     |
| <i>Cox-2</i>                    | forward   | TGACCCCCAAGGCTCAAAT      |
|                                 | reverse   | GAACCCAGGTCCTCGCTTATG    |
| <i>Rplp0</i>                    | forward   | AGGTCCTCCTTGGTGAAC       |
|                                 | reverse   | GTGCTGATGGGCAAGAAC       |
| <i>Gapdh</i>                    | forward   | AGTATGACTCCACTCACGGCAAAT |
|                                 | reverse   | GTCTCGCTCCTGGAAGATGGT    |
| <i><math>\beta</math>-actin</i> | forward   | GGCTGTATTCCCCTCCATCG     |
|                                 | reverse   | CCAGTTGGTAACAATGCCATGT   |
| <i>Eef2</i>                     | forward   | CGGGACACGGCTCTTAACAT     |
|                                 | reverse   | CTTCCTGGAGGCACTTACCC     |

Note: peroxisome proliferator-activated receptor- $\gamma$ , Ppar- $\gamma$ ; CCAAT/enhancer-binding protein  $\alpha$ , C/ebpa; fatty acid synthase, Fasn; ATP-citrate lyase, Acly; fatty acid-binding protein 4, Fabp4; cluster of differentiation 36, Cd36; diacylglycerol O-acyltransferase 1, Dgat1; glycerol-3-phosphate O-acyltransferase, Gpat; Peroxisome proliferator-activated receptor  $\gamma$  coactivator 1  $\alpha$ , Pgc1 $\alpha$ ; carnitine palmitoyltransferase 1 $\alpha$ , Cpt1 $\alpha$ ; interleukin-6, Il-6; tumor necrosis factor- $\alpha$ , Tnf- $\alpha$ ; inducible nitric oxide synthase, inos; cyclooxygenase-2, Cox-2.
